# Supplementary material
Source: PubMed Central journal article supplement (PMC4251659)
Supplement: NIHMS604706-supplement-Supplementary_Tables.pdf [file NIHMS604706-supplement-Supplementary_Tables.pdf]

**Supplemental On-Line Appendix**

**eTable 1.** Linear regression model

| <b>Variable</b>                                                         | <b>Coefficient (95% CI)</b> | <b>p-value</b> |
|-------------------------------------------------------------------------|-----------------------------|----------------|
| Model: Google Maps estimate, time-of-day, population density and season |                             |                |
| Google Maps estimate                                                    | 0.80 (0.79 to 0.81)         | <0.001         |
| Time-of-day                                                             |                             |                |
| Morning (6-10am)                                                        | Ref                         |                |
| Mid-day (10am-3pm)                                                      | 0.56 (0.36 to 0.77)         | <0.001         |
| Afternoon (3pm-8pm)                                                     | 0.53 (0.31 to 0.74)         | <0.001         |
| Nighttime (8pm-6am)                                                     | -1.20 (-1.40 to -0.99)      | <0.001         |
| Population density                                                      |                             |                |
| Less than 70 <sup>th</sup> percentile                                   | Ref                         |                |
| 70 to 79 <sup>th</sup> percentile                                       | -0.67 (-1.11 to -0.24)      | 0.002          |
| 80 to 89 <sup>th</sup> percentile                                       | -1.01 (-1.42 to -0.61)      | <0.001         |
| Greater than 89 <sup>th</sup> percentile                                | -0.39 (-0.79 to 0.01)       | 0.06           |
| Season                                                                  |                             |                |
| Winter                                                                  | Ref                         |                |
| Spring                                                                  | -0.23 (-0.42 to -0.37)      | 0.02           |
| Summer                                                                  | 0.12 (-0.8 to 0.31)         | 0.24           |
| Fall                                                                    | 0.03 (-0.17 to 0.22)        | 0.33           |
| Constant                                                                | 3.34 (2.86 to 0.23)         | <0.001         |

CI, confidence interval

**eTable 2.** Comparison of Google Maps transport time estimation to regression model.

|                                                              | <b>Google Maps</b> | <b>Regression Model</b> |
|--------------------------------------------------------------|--------------------|-------------------------|
| Mean absolute error in minutes* (SD)                         | 3.5 (5.4)          | 3.4 (5.1)               |
| Range error in minutes                                       | 0 to 157           | 0 to 122                |
| Percentage of estimates within one minute of observed time   | 23.9               | 25.7                    |
| Percentage of estimates within five minutes of observed time | 86.6               | 88.6                    |
| Percentage of estimates within ten minutes of observed time  | 94.5               | 95.0                    |

SD, standard deviation

\* Difference in mean absolute errors was statistically significant with p-value <0.01.
